# Supplementary material for: High-resolution structures of multiple 5-HT3AR-setron complexes reveal a novel mechanism of competitive inhibition
Source: eLife. 2020 Oct 16;9:e57870. doi: 10.7554/eLife.57870 (PMC7655109; doi:10.7554/eLife.57870)
Supplement: Figure 6—source data 1. [file elife-57870-fig6-data1.xlsx]

## Sheet: Fig6c
(microM) Sertonin	Normalized current	SD		(microM) Sertonin	Normalized current	SD
	wt				R65A
30	1	0		100	1	0
10	0.94636	0.01874		20	0.78367	0.0372
5	0.83376	0.00479		15	0.62524	0.16071
3	0.53026	0.04279		10	0.15961	0.11691
2	0.35284	0.03557		5	0.04808	0.02037
1	0.091	0.0472		2.5	0.00482	0.00232
n =4				n =4

## Sheet: Fig6e
5HT3A-Granisetron
	WT						R65
	Peak 1	Peak 2	Peak2/Peak1				Peak 1	Peak 2	Peak2/Peak1
	0.2	0.119	0.595				0.64	0.44	0.6875
	0.94	0.5	0.53191				1.29	0.98	0.75969
	0.54	0.25	0.46296				1.69	1.35	0.79882
	1.2	0.54	0.45				1.61	1.35	0.83851
	0.7	0.27	0.38571
Mean	0.50997						0.77113
SD	0.06713						0.06437
n	5						4
5HT3A-Palonosetron
	WT						R65
	Peak 1	Peak 2	Peak2/Peak1				Peak 1	Peak 2	Peak2/Peak1
	1.7	0.77	0.45294				0.63	0.62	0.98413
	1.41	0.67	0.47518				0.84	0.9	1.07143
	1.95	0.71	0.3641				0.76	0.89	1.17105
	0.44	0.13	0.29545				1.3	1.35	1.03846
	3.14	1.77	0.56369				1.37	1.35	0.9854
	2.48	1.22	0.49194
Mean	0.43027						1.05009
SD	0.10354						0.07707
n	6						5
5HT3A-Ondansetron
	WT						R65
	Peak 1	Peak 2	Peak2/Peak1				Peak 1	Peak 2	Peak2/Peak1
	3.15	1.9	0.60317				0.81	0.86	1.06173
	1.74	0.64	0.36782				1.94	1.65	0.85052
	8.83	4.51	0.51076				1.09	1.11	1.01835
	3.05	2.03	0.66557				1.43	1.43	1
	1.81	1.22	0.67403
Mean	0.53683						0.98265
SD	0.12939						0.09181
n	5						4
5HT3A-Alosetron
	WT						R65
	Peak 1	Peak 2	Peak2/Peak1				Peak 1	Peak 2	Peak2/Peak1
	5.28	2.23	0.42235				1.57	1.01	0.64331
	4.66	2.44	0.52361				1.45	1.14	0.78621
	4.11	2.47	0.60097				1.04	0.99	0.95192
	2.51	1.52	0.60558				1.09	0.97	0.88991
							1.34	1.25	0.93284
							1.29	1.2	0.93023
Mean	0.53813						0.81784
SD	0.08586						0.13495
n	4						6
