# Supplementary figures and images for: High-resolution structures of multiple 5-HT3AR-setron complexes reveal a novel mechanism of competitive inhibition
Source: eLife journal article supplement (doi:10.7554/elife.57870), 2020-10-16

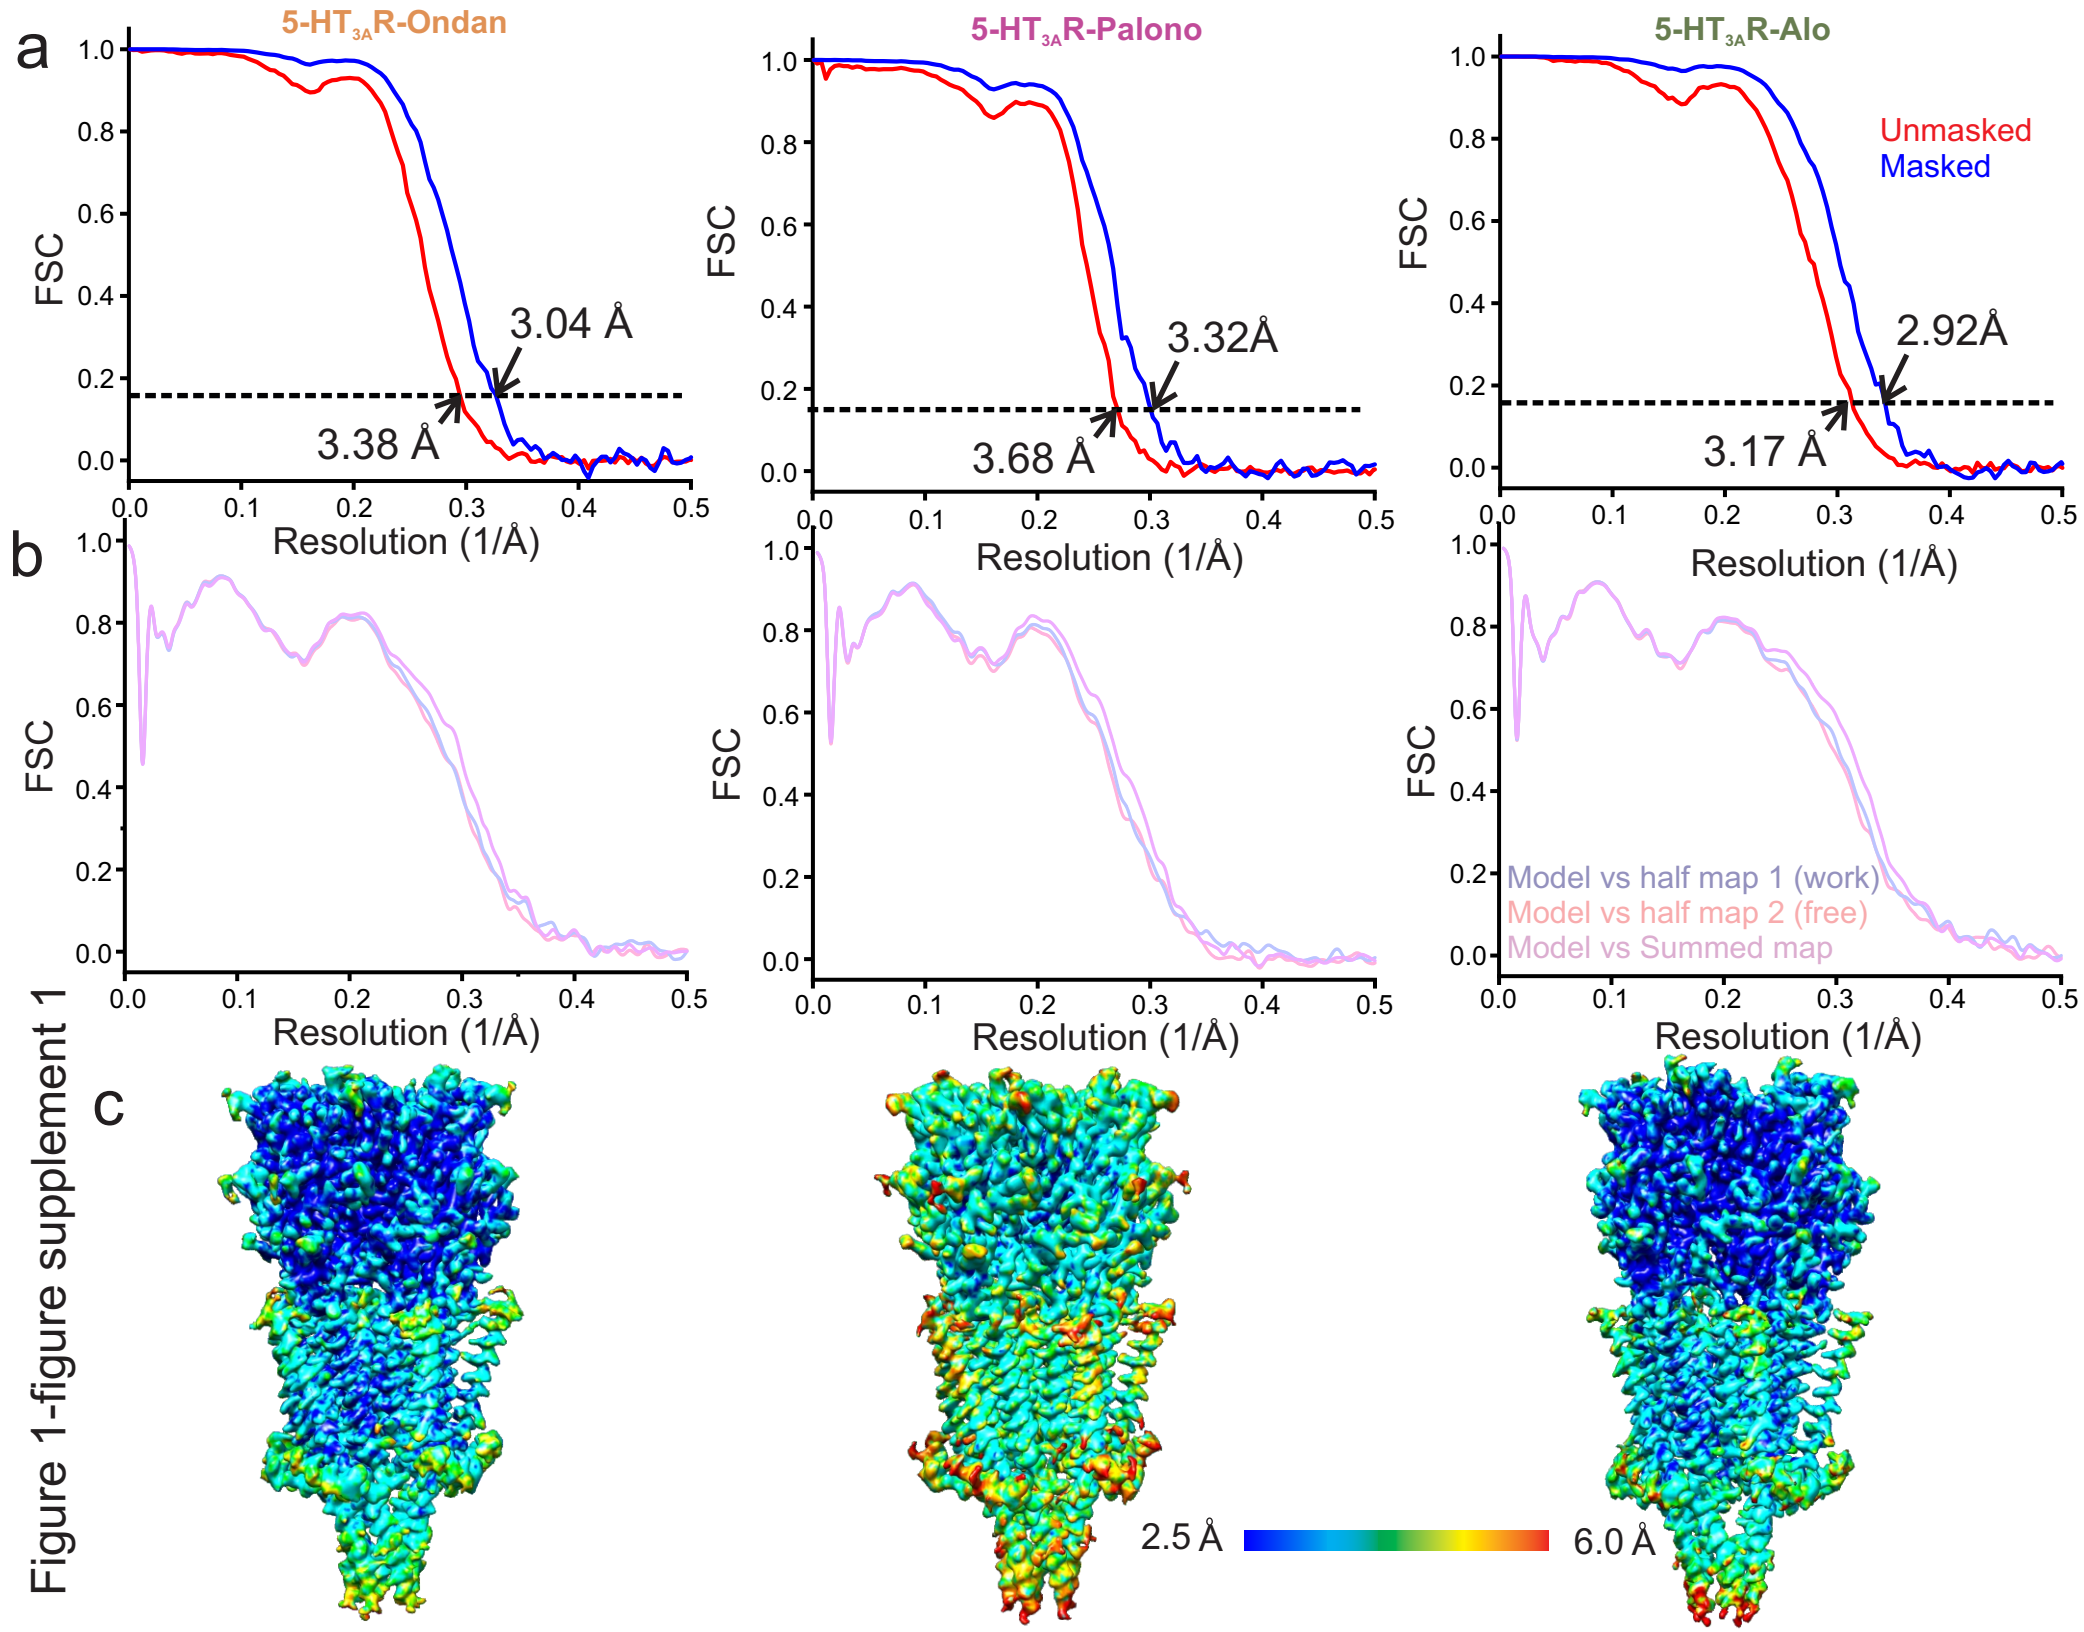

Figure 1-figure supplement 1

Supplement: supp [file elife_poa_e57870_Figure_1_figure_supplement_1.pdf › elife_poa_e57870_Figure_1_figure_supplement_1.pdf]

5-HT<sub>3A</sub>R-Ondan

5-HT<sub>3A</sub>R-Palono

5-HT<sub>3A</sub>R-Alo

Loop C

M2

Figure 1- figure supplement 2

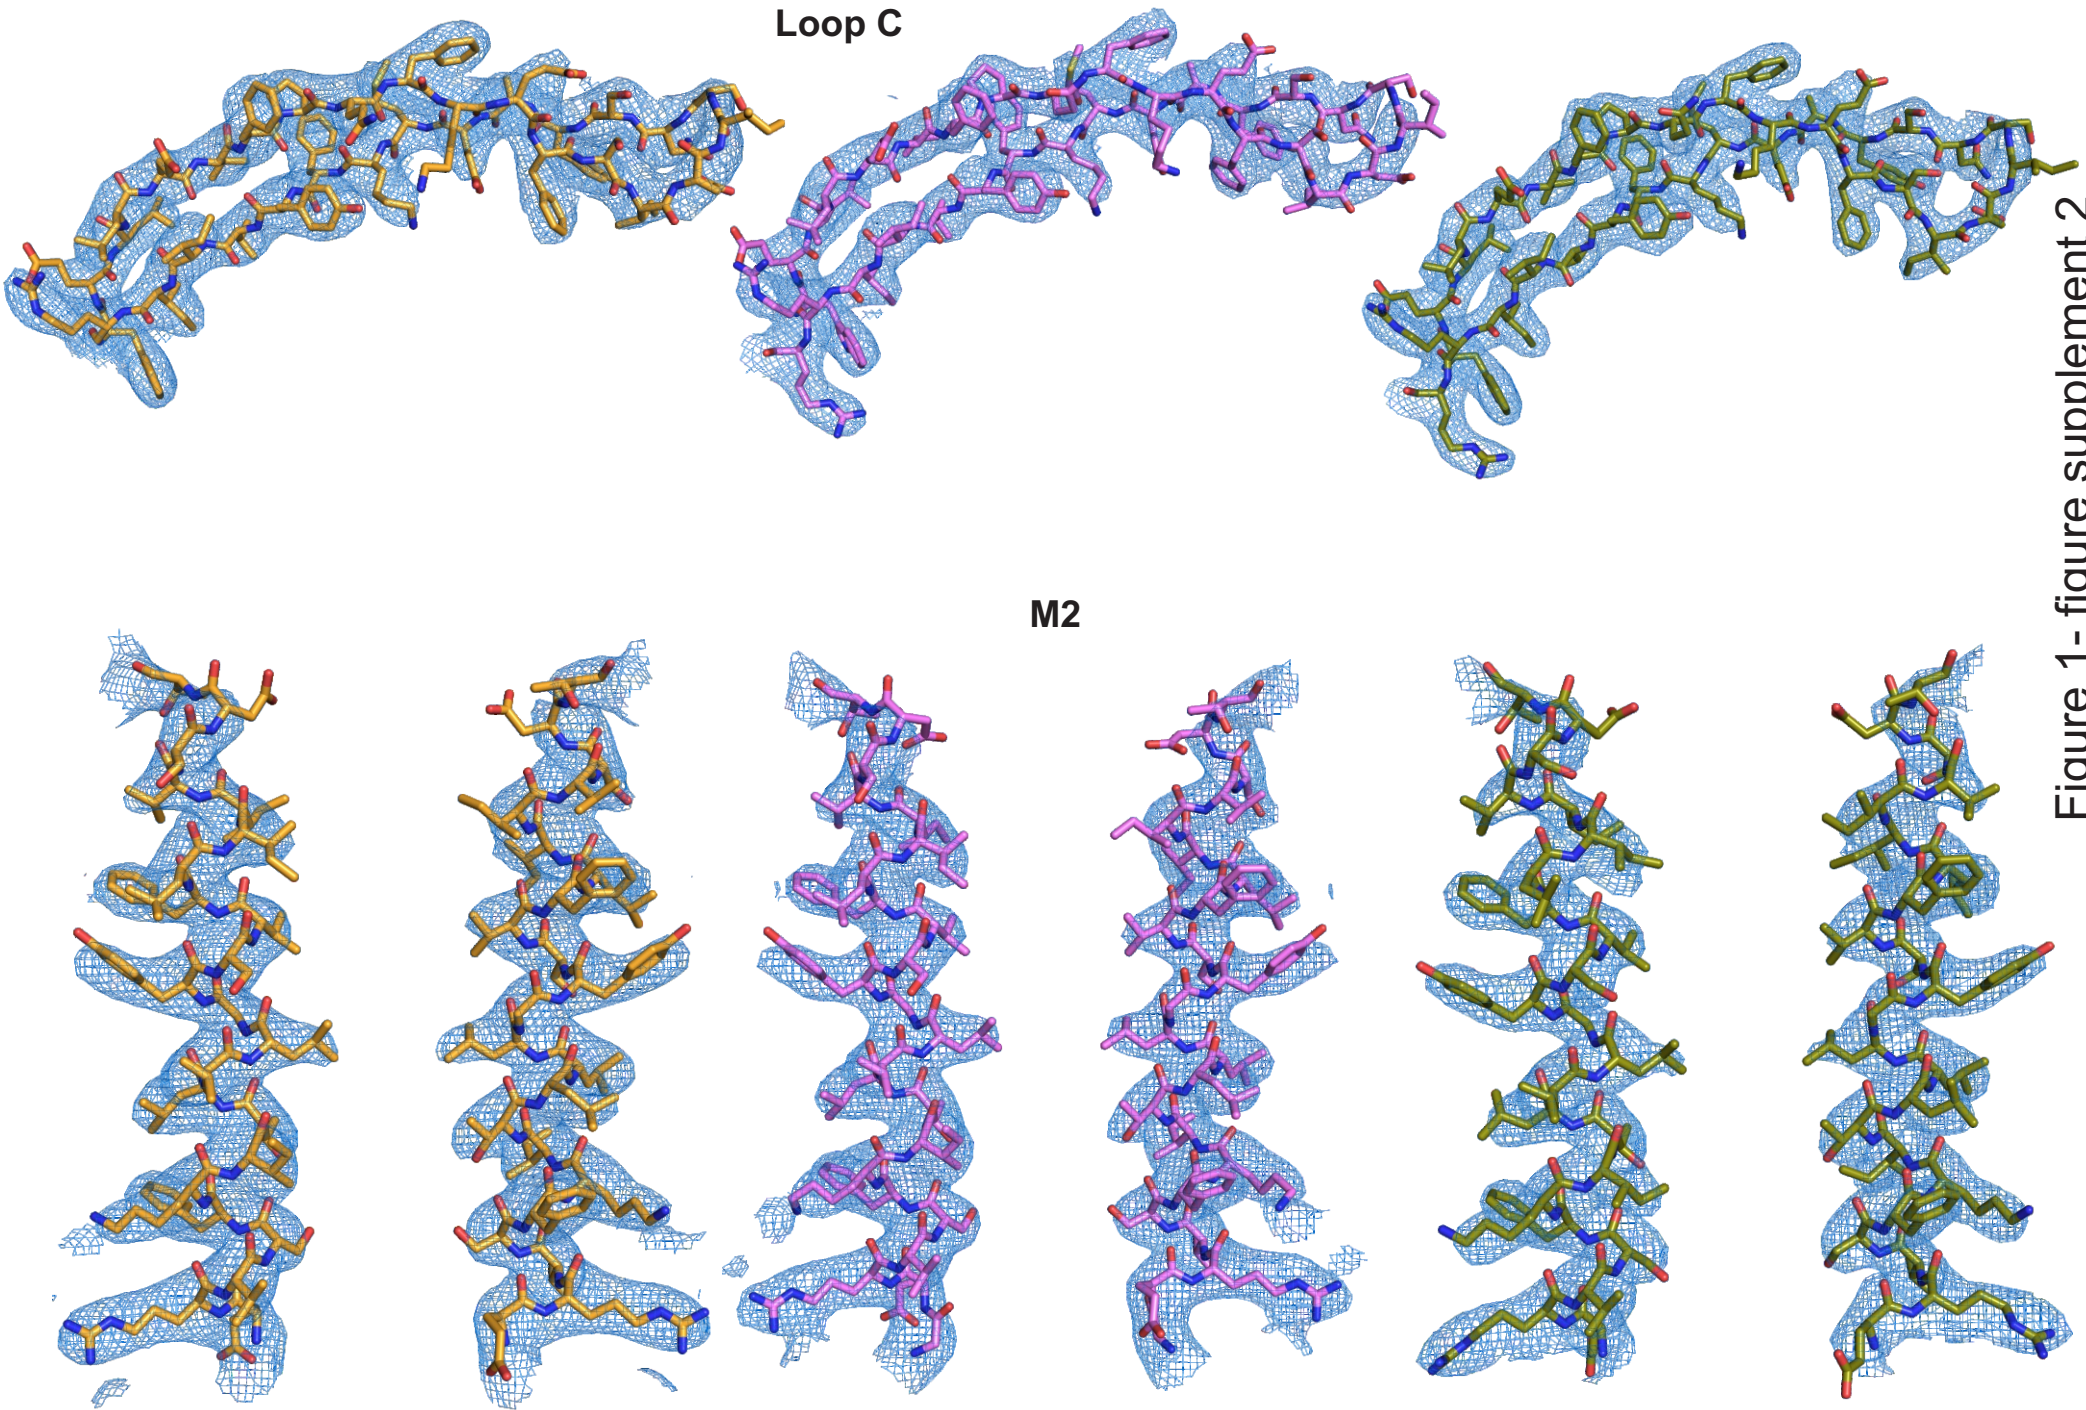

Supplement: supp [file elife_poa_e57870_Figure_1_figure_supplement_2.pdf › elife_poa_e57870_Figure_1_figure_supplement_2.pdf]

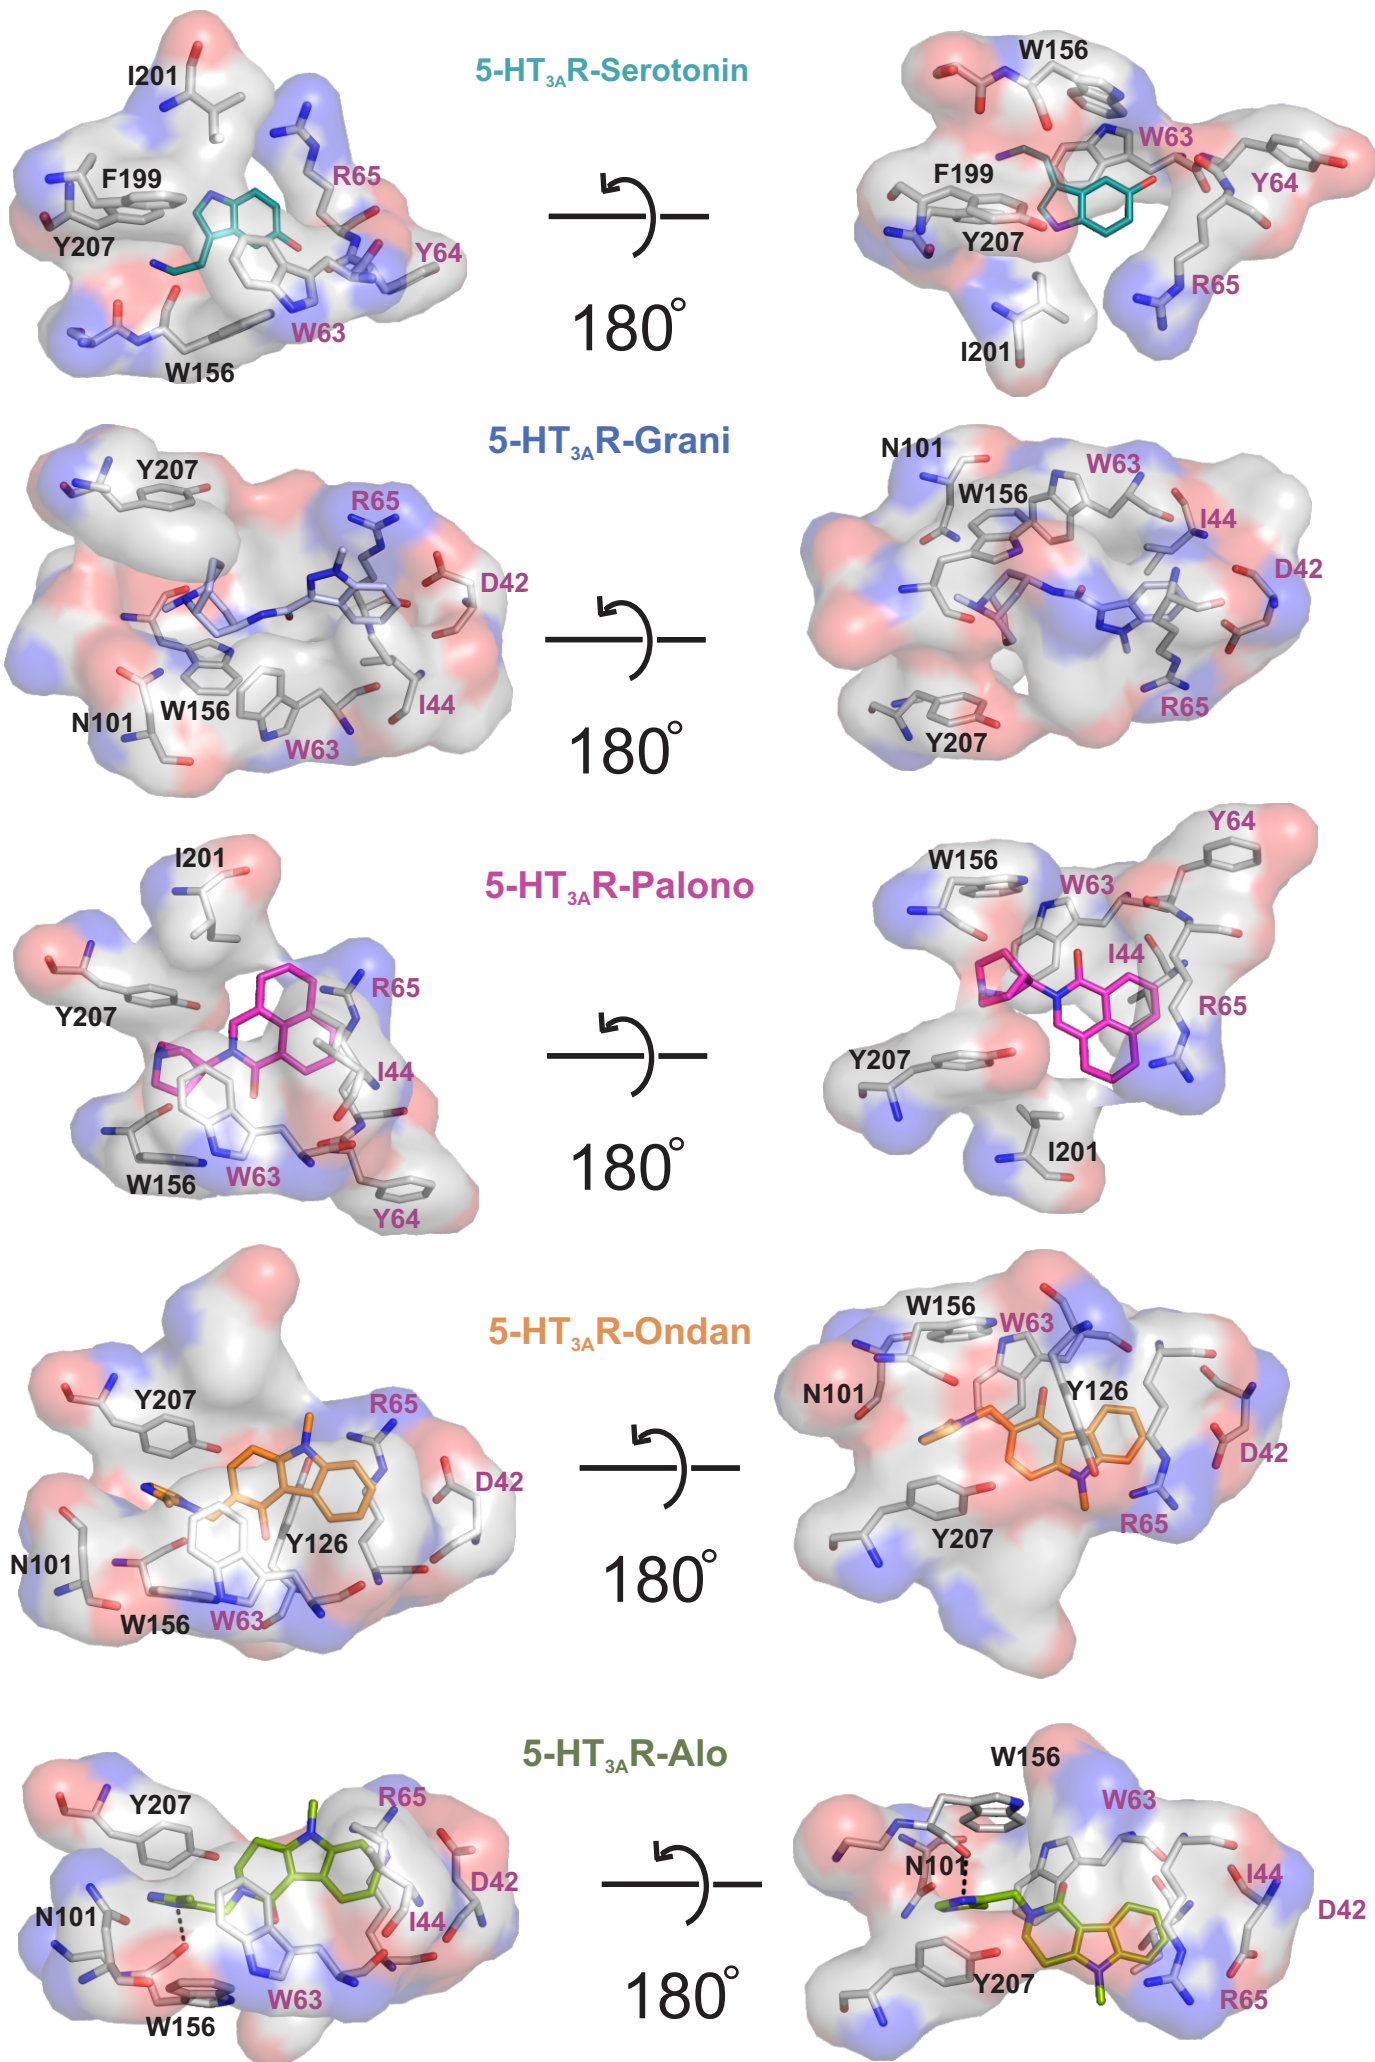

Figure 2-figure supplement 1

Supplement: supp [file elife_poa_e57870_Figure_2_figure_supplement_1.pdf › elife_poa_e57870_Figure_2_figure_supplement_1.pdf]

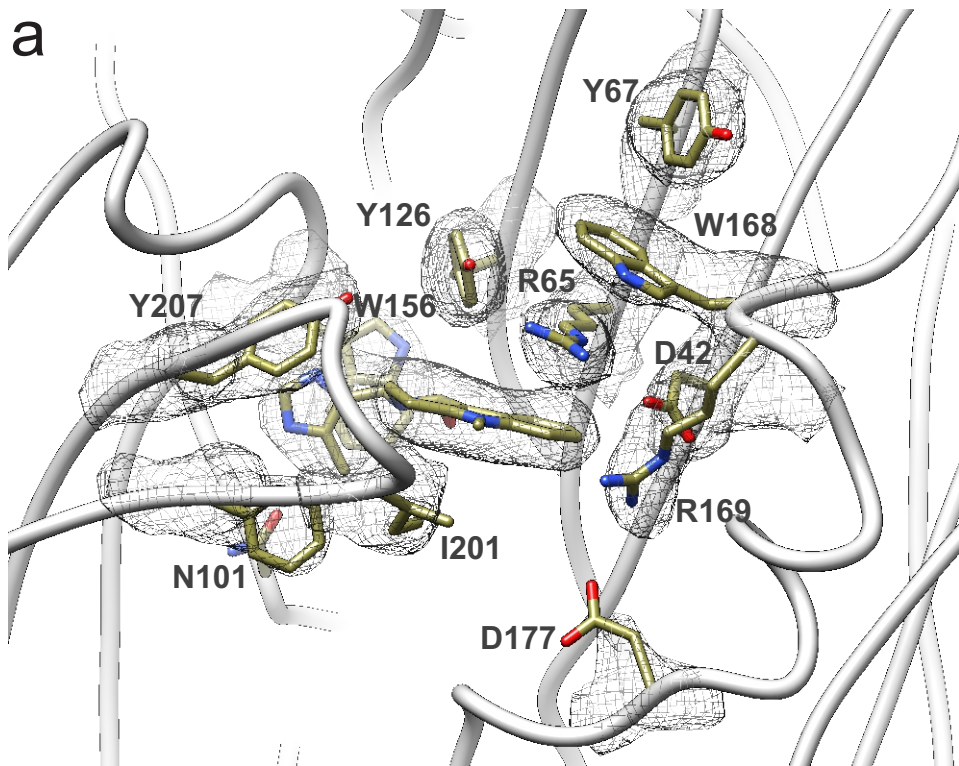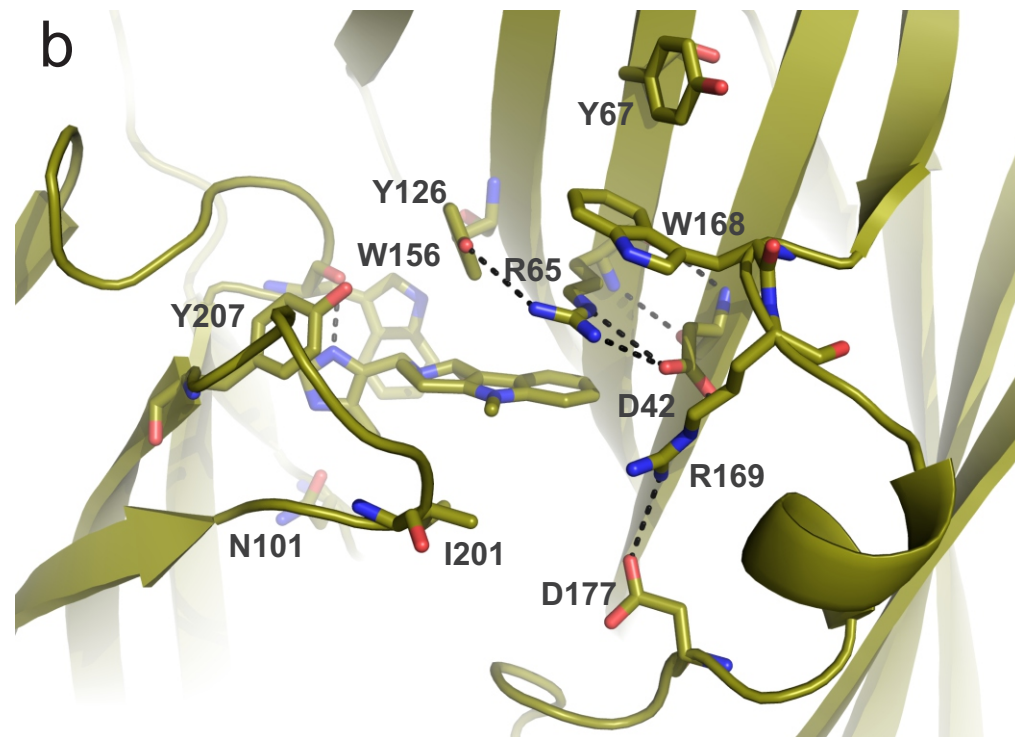

Figure 2- figure supplement 2

Supplement: supp [file elife_poa_e57870_Figure_2_figure_supplement_2.pdf › elife_poa_e57870_Figure_2_figure_supplement_2.pdf]

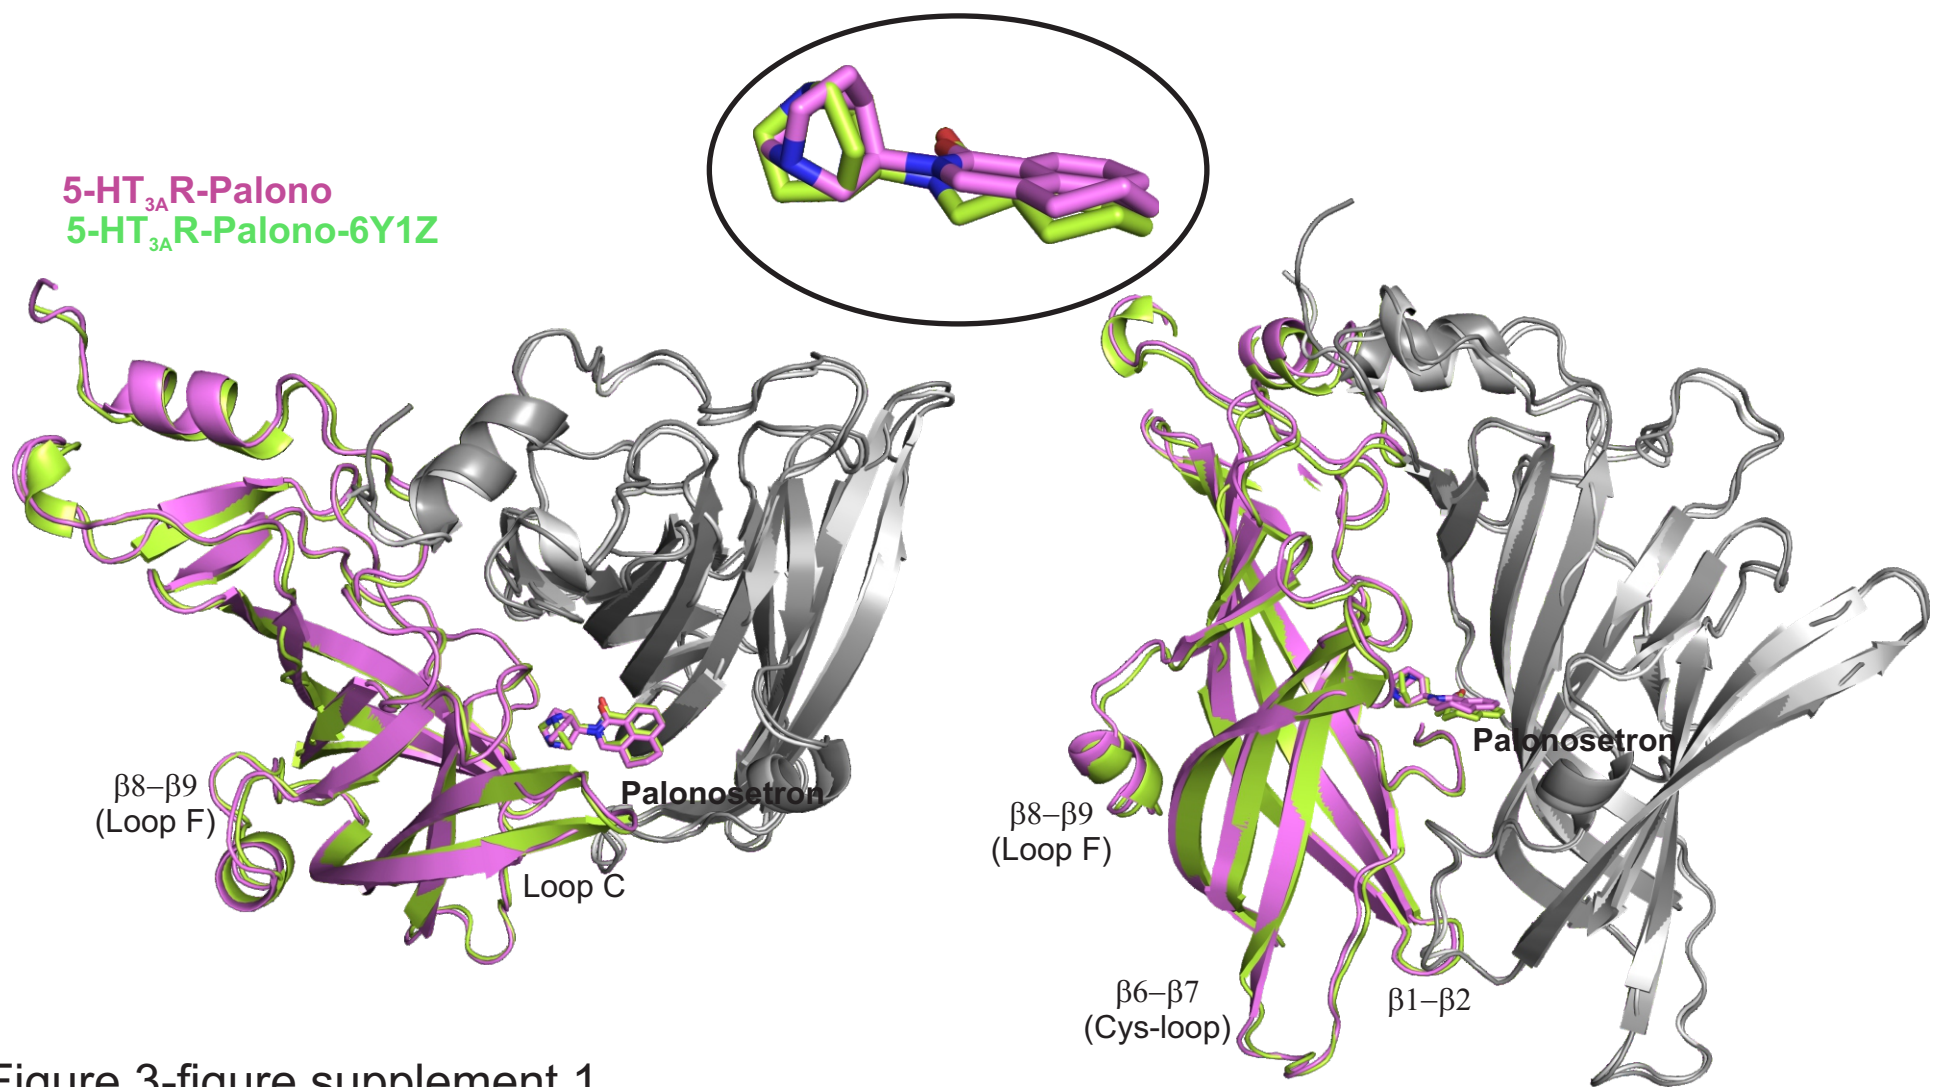

Figure 3-figure supplement 1

Supplement: supp [file elife_poa_e57870_Figure_3_figure_supplement_1.pdf › elife_poa_e57870_Figure_3_figure_supplement_1.pdf]

Figure 3-figure supplement 2

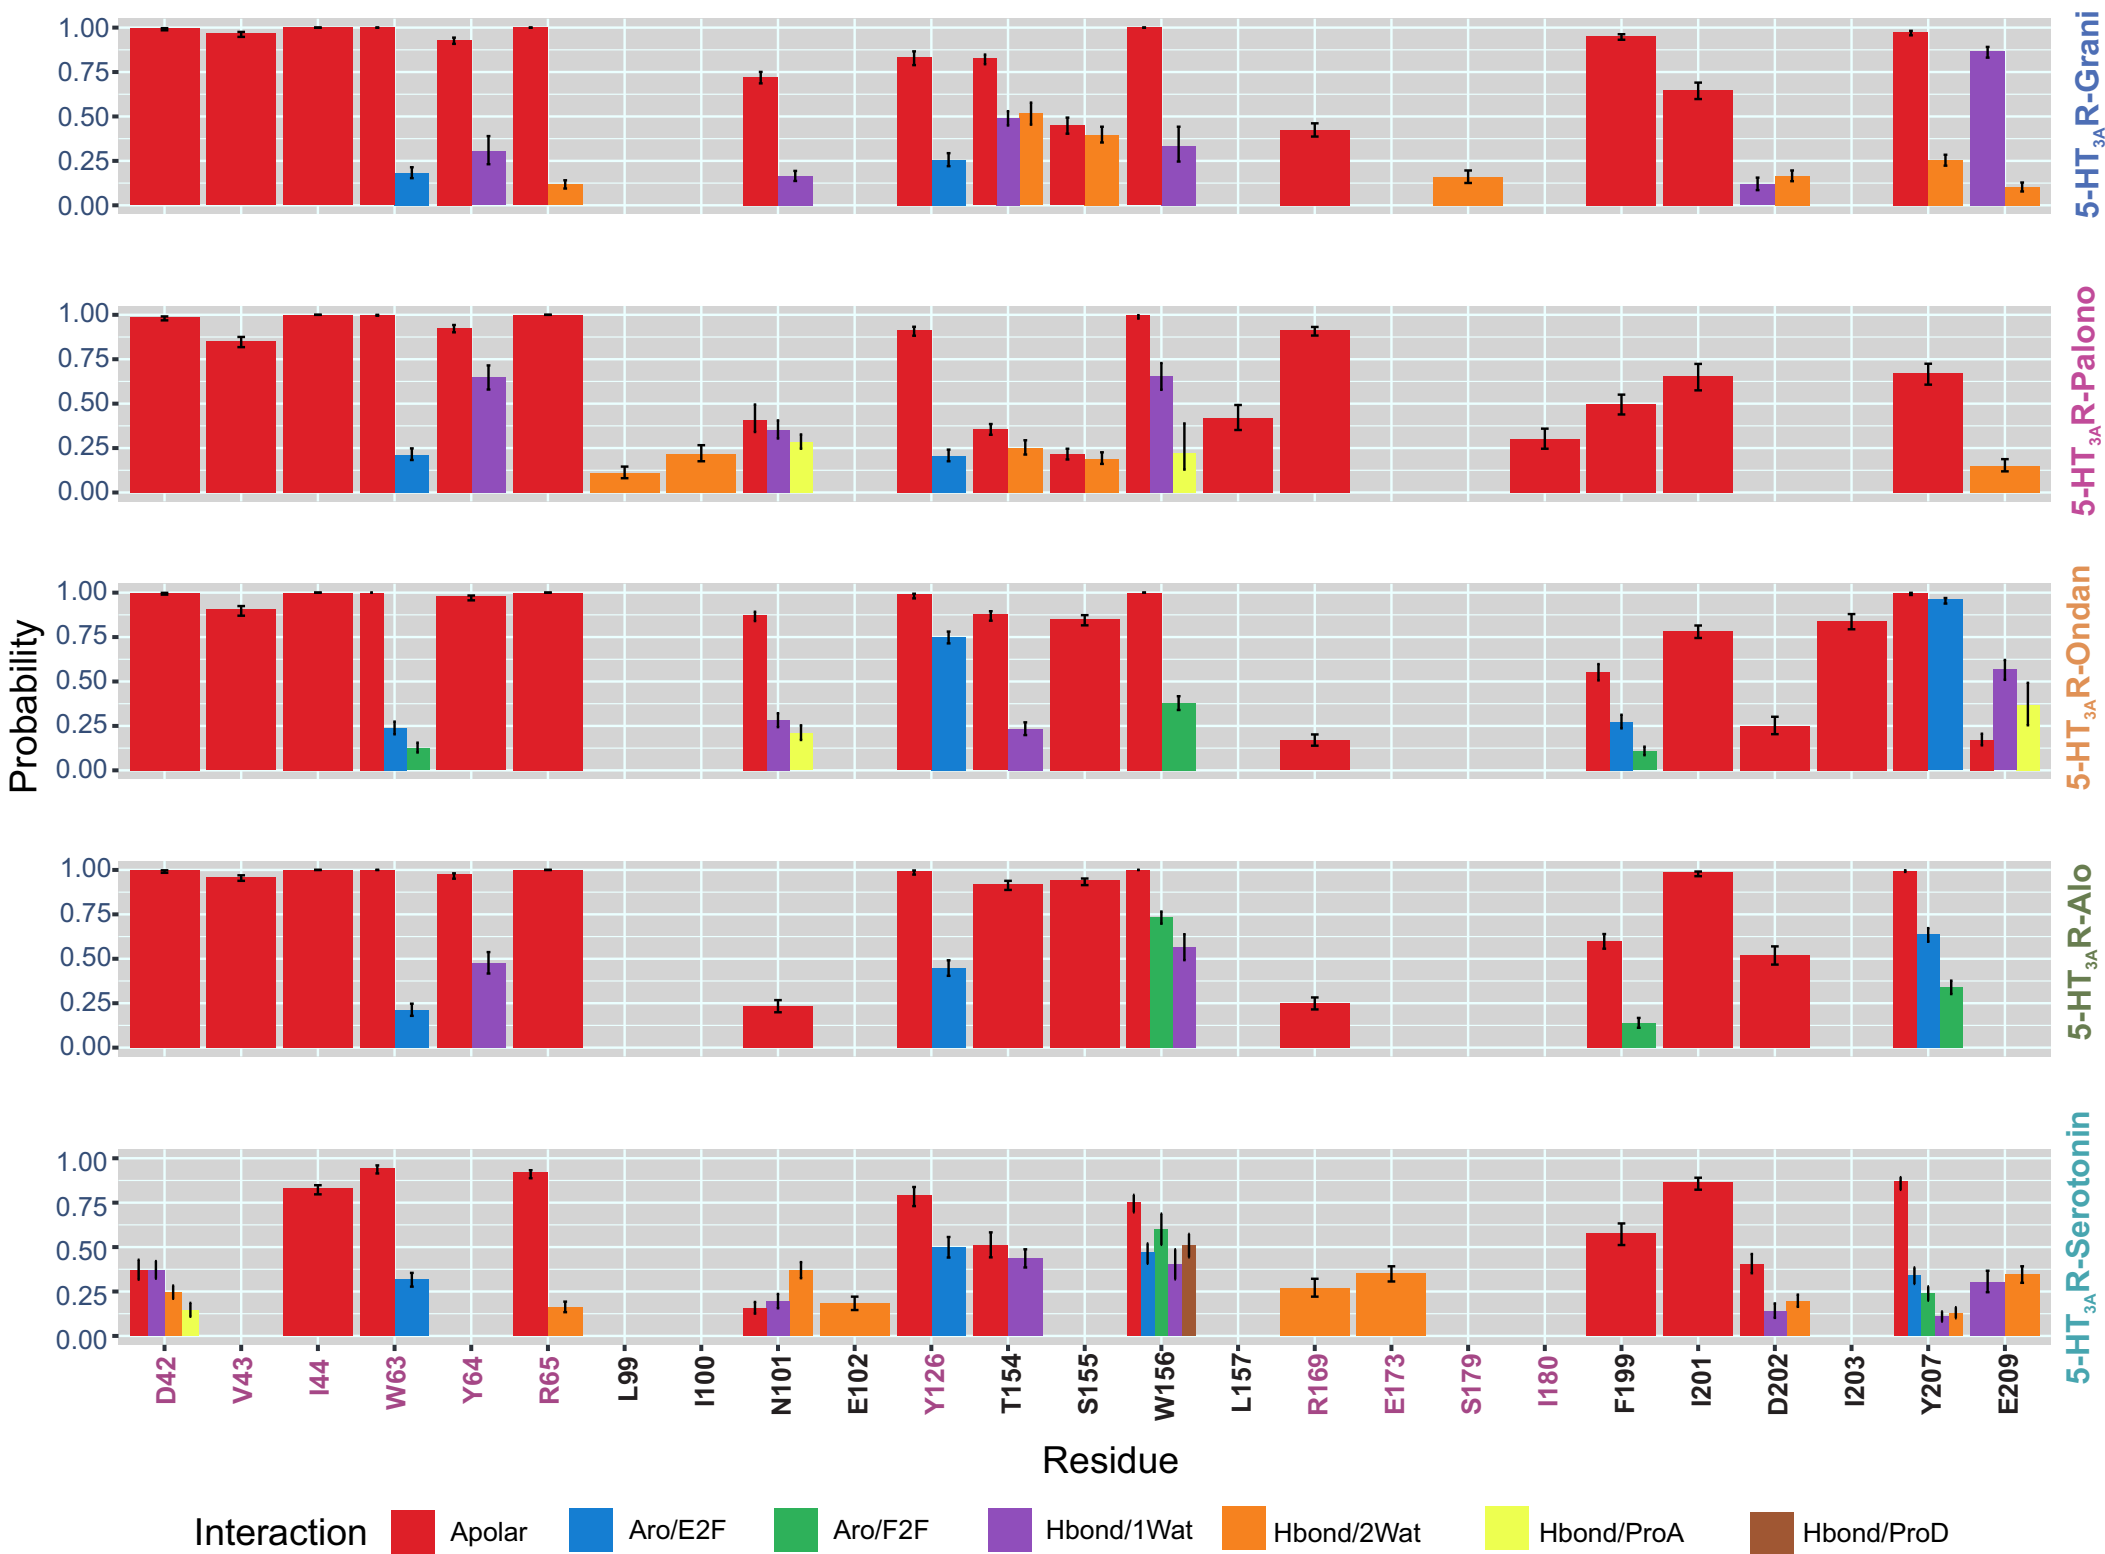

Supplement: supp [file elife_poa_e57870_Figure_3_figure_supplement_2.pdf › elife_poa_e57870_Figure_3_figure_supplement_2.pdf]

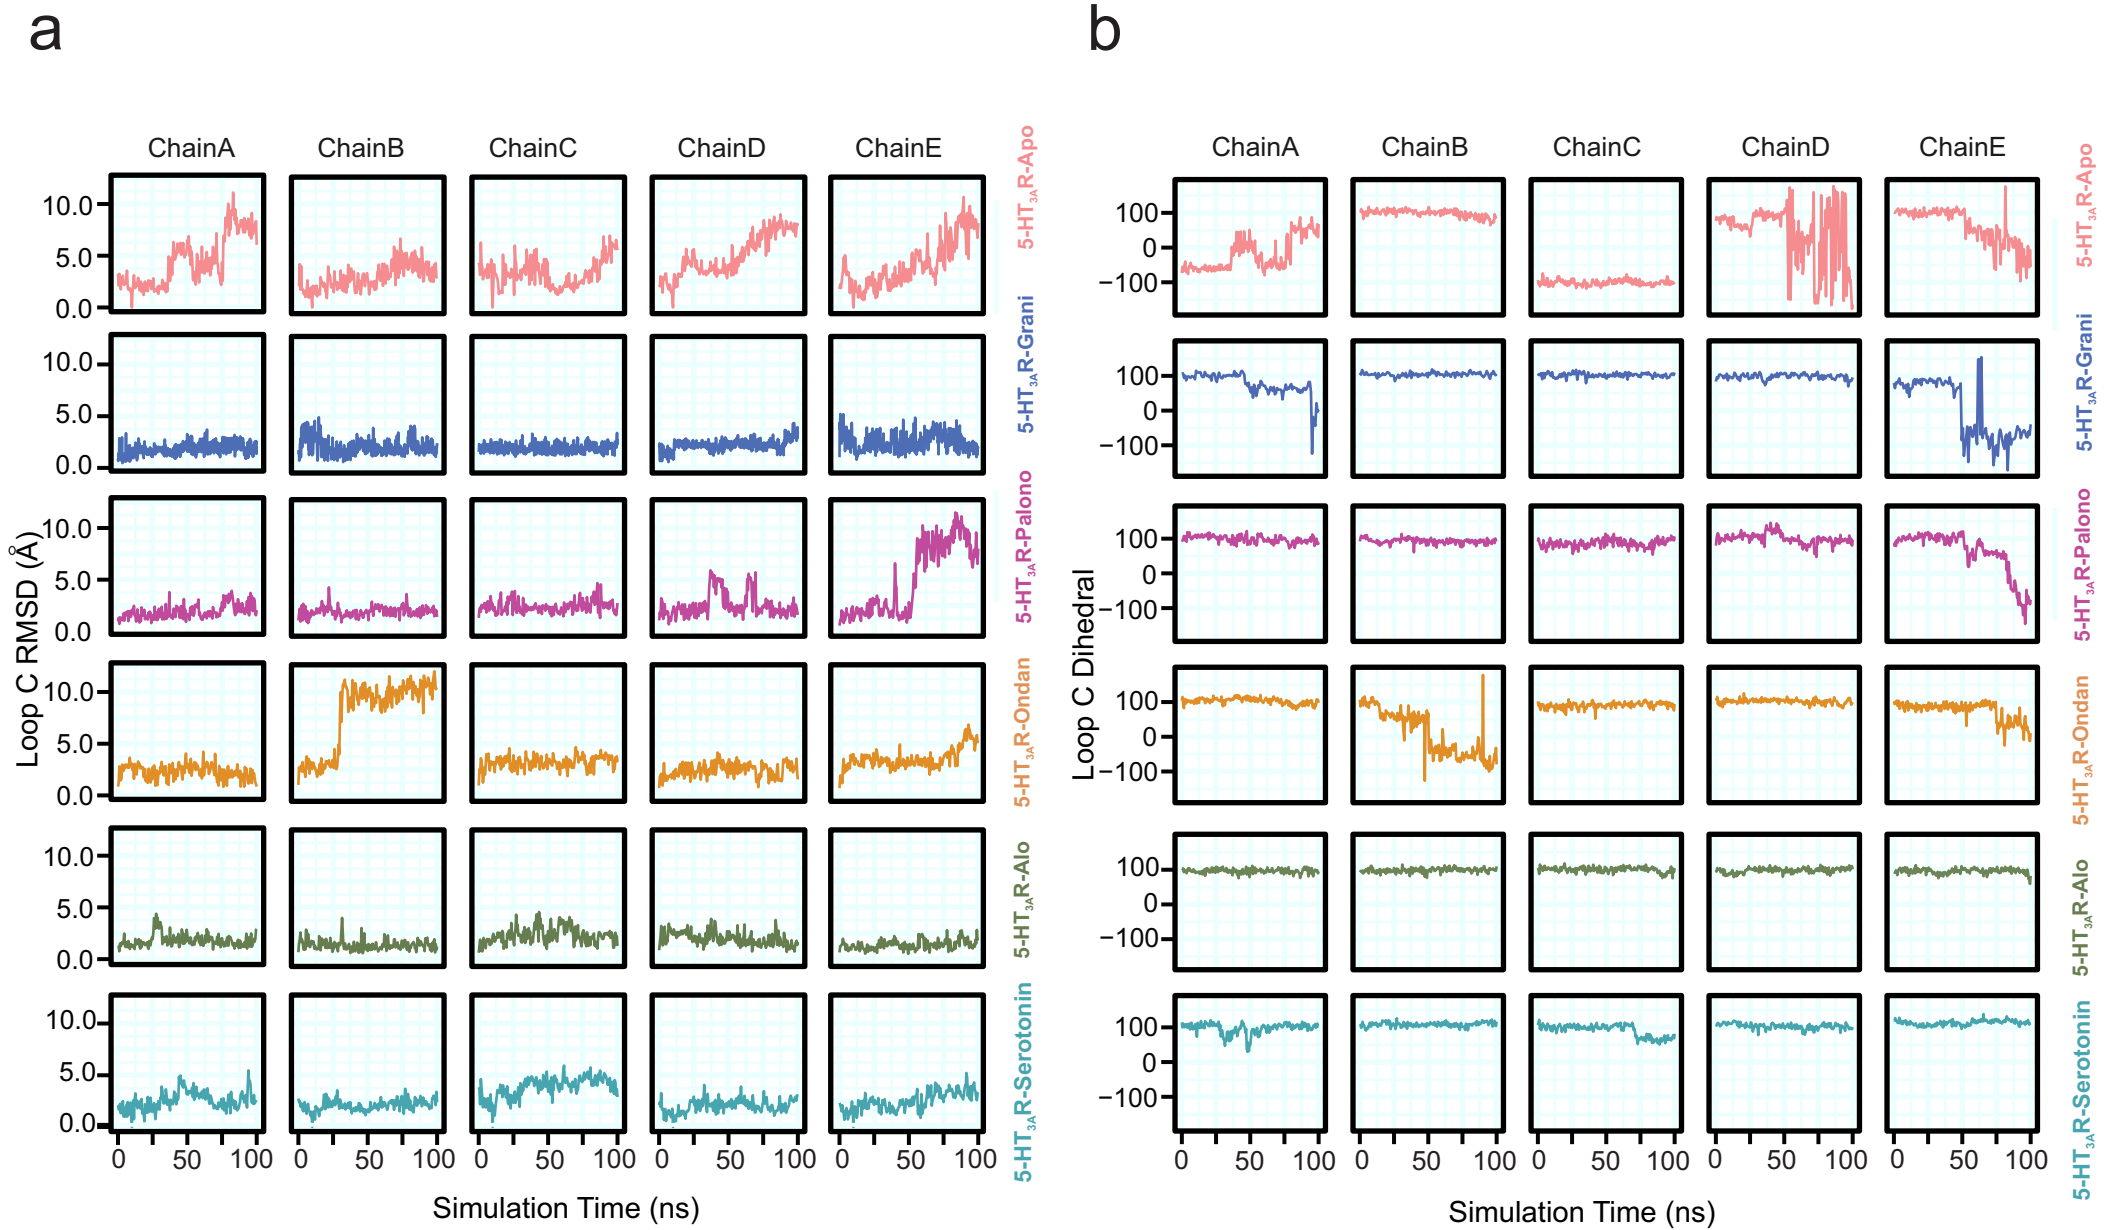

Figure 4-figure supplement 1

Supplement: supp [file elife_poa_e57870_Figure_4_figure_supplement_1.pdf › elife_poa_e57870_Figure_4_figure_supplement_1.pdf]

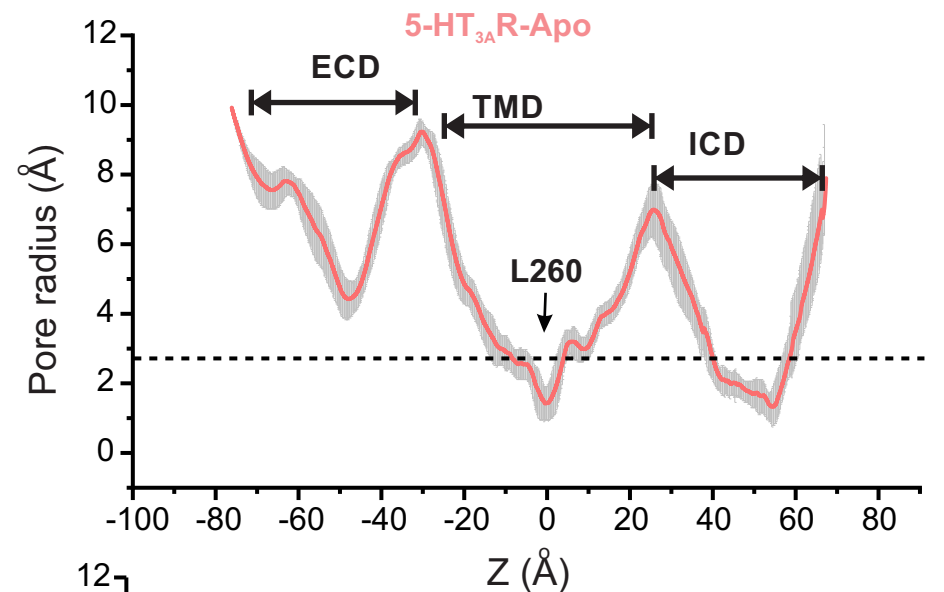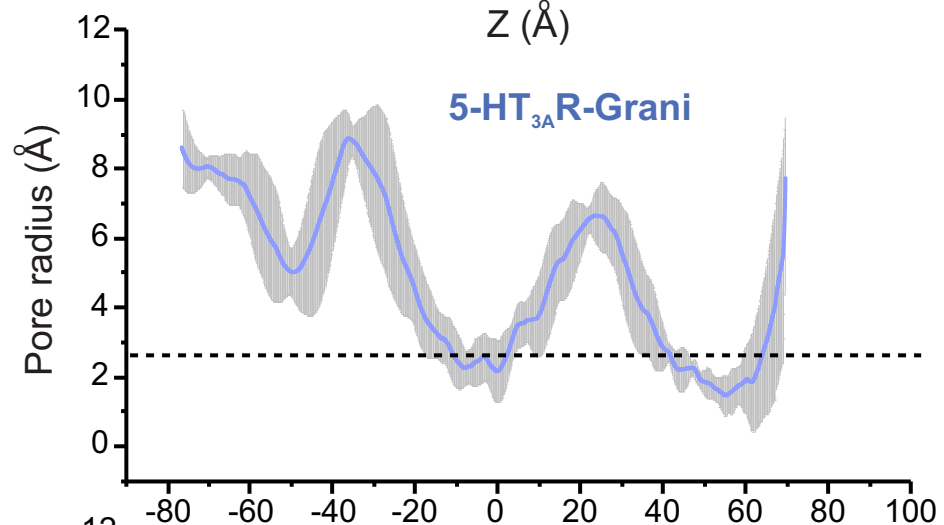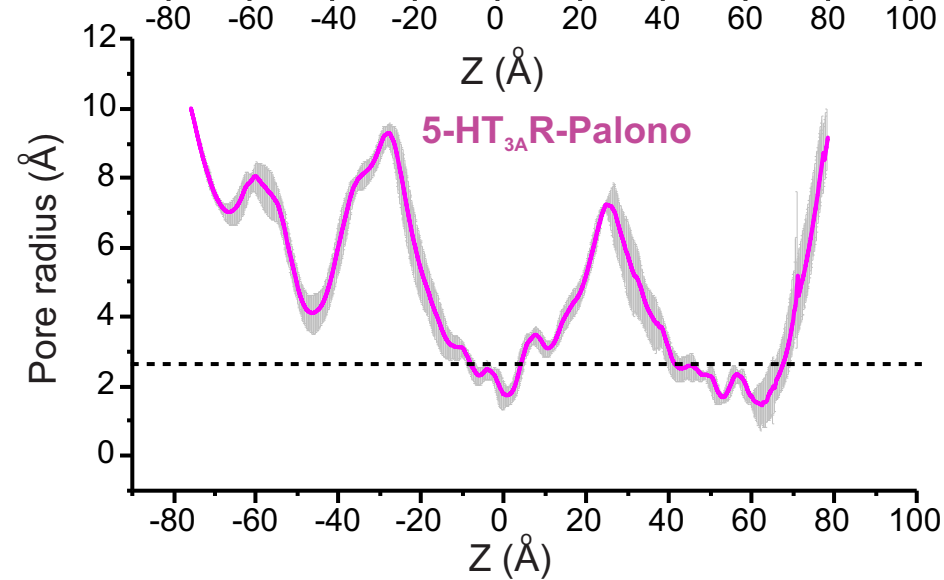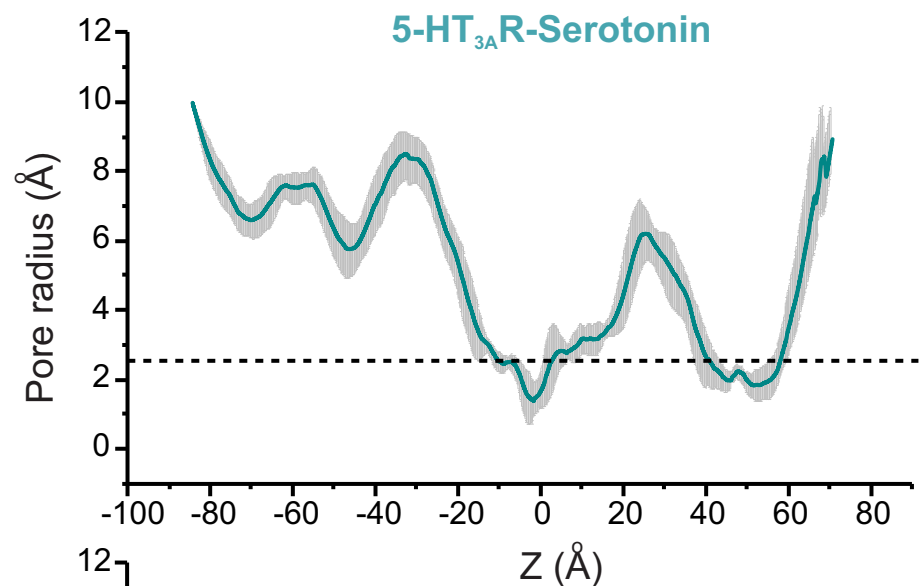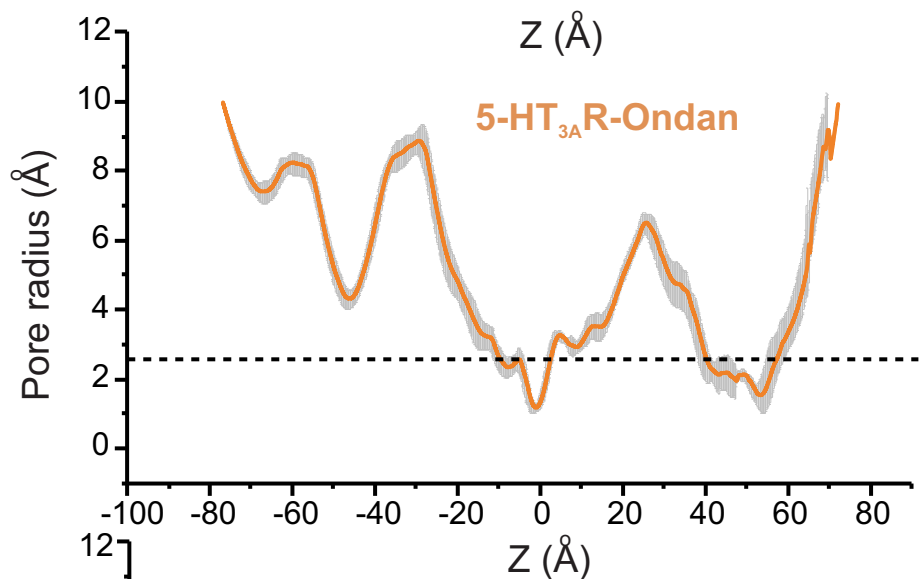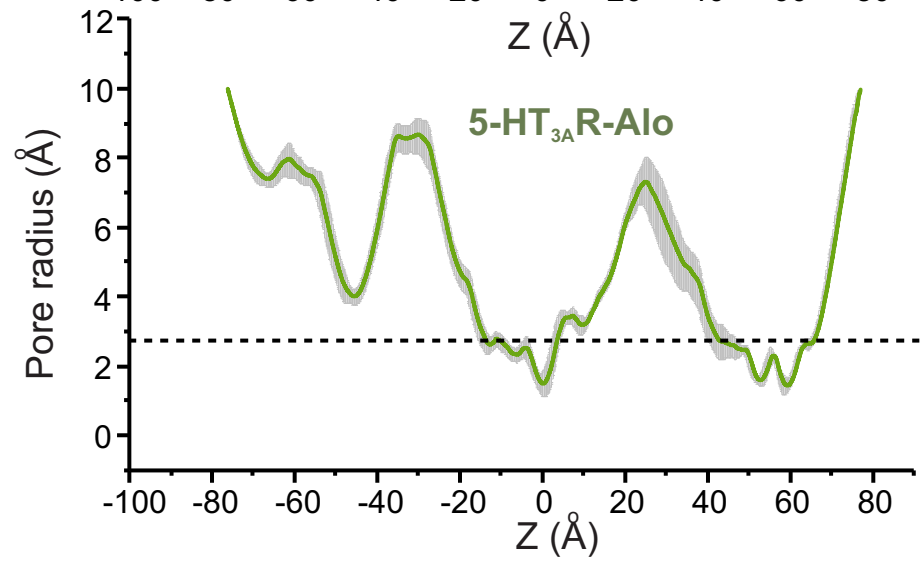

Figure 7-figure supplement 1

Supplement: supp [file elife_poa_e57870_Figure_7_figure_supplement_1.pdf › elife_poa_e57870_Figure_7_figure_supplement_1.pdf]
